# Supplementary material for: Exosomes Secreted from Adipose-Derived Stem Cells Are a Potential Treatment Agent for Immune-Mediated Alopecia
Source: Hindawi journal article supplement (doi:10.1155/2022/7471246), 2022-02-03
Supplement: f1 [file 7471246.f1.zip]

**Table S1. Primer sequences for qPCR**

| Species | Primer Name    | Forward                                      | Reverse                   |
|---------|----------------|----------------------------------------------|---------------------------|
| Mouse   | WNT3A          | AACTGCACCACCGTCAGCAACA                       | AGCGTGTCAGTGCAGAAAGCTA    |
|         | AXIN2          | ATGGAGTCCCTCCTTACCGCAT                       | GTTCCACAGGCGTCATCTCCTT    |
|         | LEF1           | ACTGTCAGGCGACACTTCCATG                       | GTGCTCCTGTTTGACCTGAGGT    |
|         | SFRP1          | CAATACCACGGAAGCCTCTAAGC                      | GCAAACCTCGCTTGCACAGAGATG  |
|         | $\beta$ -actin | GGCTGTATTCCCCTCCATCG                         | CCAGTTGGTAACAATGCCATGT    |
| Rat     | SOX2           | GCACATGAACGGCTGGAGCAACG                      | TGCTGCGAGTAGGACATGCTGTAGG |
|         | $\beta$ -actin | TTCTTGCACTCCTCCGTCG                          | AGTCCTTCTGACCCATAACCA     |
|         | Mir22-5p       | ACACTCCAGCTGGGag ttcttcagtgc                 | TGGTGTCGTGGAGTCG          |
|         | Mir22-3p       | ACACTCCAGCTGGGaagc tgccagttga a              | TGGTGTCGTGGAGTCG          |
|         | U6             | CTCGCTTCGGCAGCACA                            | AACGCTTCACGAATTTGCGT      |
|         | Mir22-5pRT     | CTCAACTGGTGTCGTGGAGTCGGCAATTCAGTTGAGTAAAGCTT |                           |
|         | Mir22-3pRT     | CTCAACTGGTGTCGTGGAGTCGGCAATTCAGTTGAGACAGTTC  |                           |
